# Supplementary material for: Meta-Analysis of Gene Expression Signatures Defining the Epithelial to Mesenchymal Transition during Cancer Progression
Source: PubMed Central journal article supplement (PMC3519484; doi:10.1371/journal.pone.0051136), 2012-12-10
Supplement: pone.0051136.s002.pdf [file pone.0051136.s002.pdf]

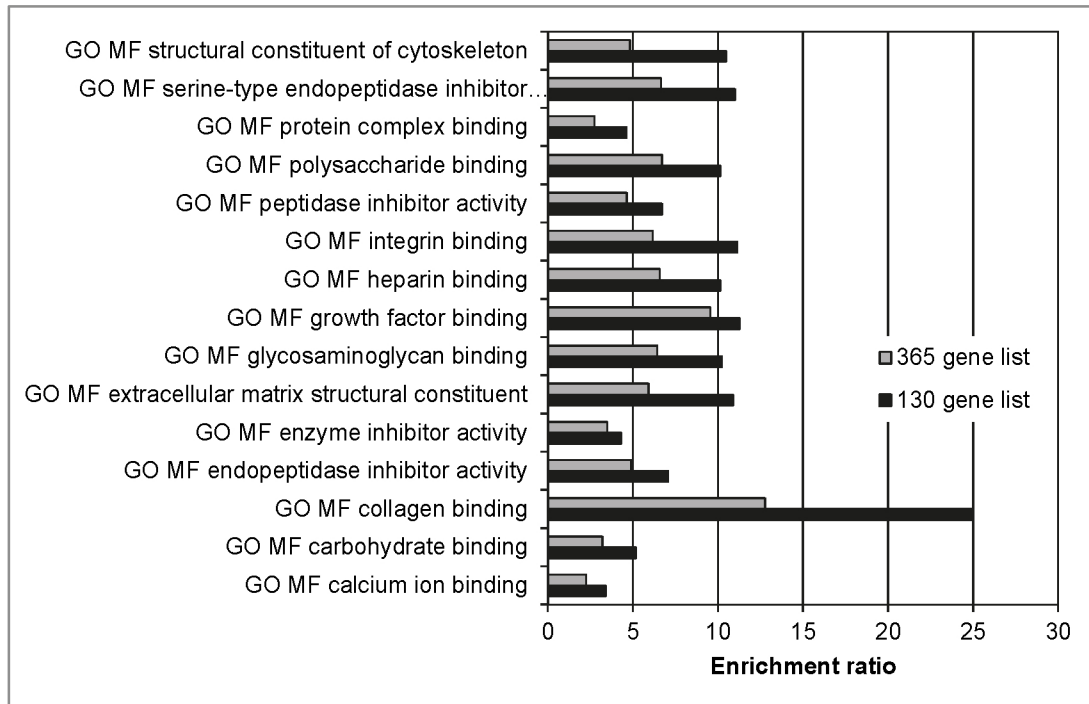

**Figure S2: The 130 genes EMT-core list and the 365 genes list exhibit comparable enrichment ratios of GO molecular functions.** The enrichment ratio is the number of observed genes divided by the number of expected genes for a given term or pathway. Enrichment ratios were obtained from WebGestalt or calculated with data from FatiGO. GO, gene ontology; BP, biological process; MF, molecular function; KEGG, Kyoto encyclopedia of genes and genomes.
